# Supplementary material for: Free and Bound Phenolic Profiles and Antioxidant Activities in Melon (Cucumis melo L.) Pulp: Comparative Study on Six Widely Consumed Varieties Planted in Hainan Province
Source: MDPI journal article supplement (doi:10.3390/foods12244446), 2023-12-12
Supplement: s1 [file s1]

## **Supplementary material**

**“Free and bound phenolic profiles and antioxidant activities in melon (*Cucumis melo* L.) pulp: Comparative study on six widely consumed varieties planted in Hainan province”**

**Figure S1 Photographic images of six melon varieties planted in the Hainan province of China.**

**Figure S2 Hierarchical Cluster Analysis of free, bound, and total TPC, FRAP, ABTS<sup>+</sup>, and phenolic profiles of six melon varieties.**

**Figure S3 Total ion chromatogram of free extracts of the pulp of six melon varieties analyzed by UHPLC-QQQ-MS in negative and positive modes.**

**Figure S4 Total ion chromatogram of bound extracts of the pulp of six melon varieties analyzed by UHPLC-QQQ-MS in negative and positive modes.**

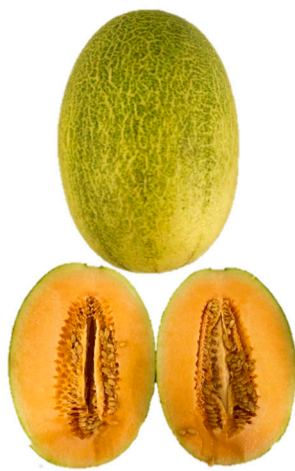

**Xizhoumi No.25**

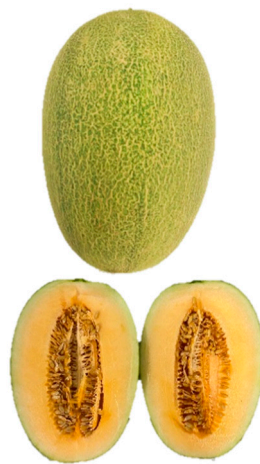

**Xiaomi No.25**

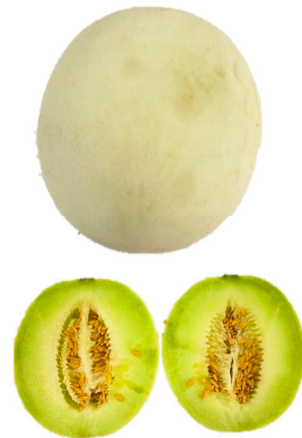

**Naixiangmi**

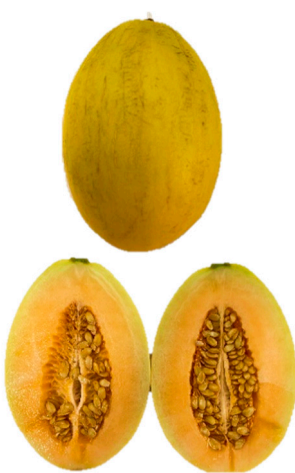

**Hongguan**

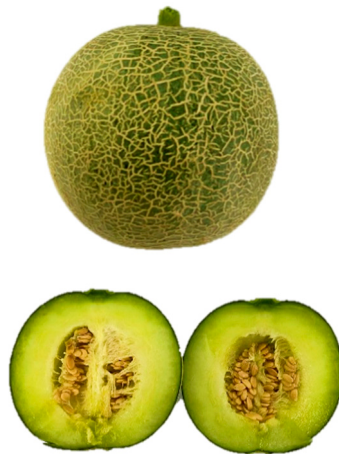

**Meilong**

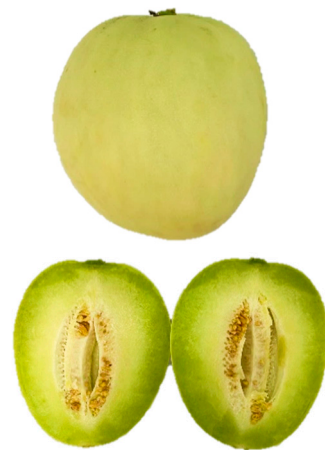

**Yugu**

**Figure S1 Photographic images of six melon varieties planted in the Hainan province of China.**

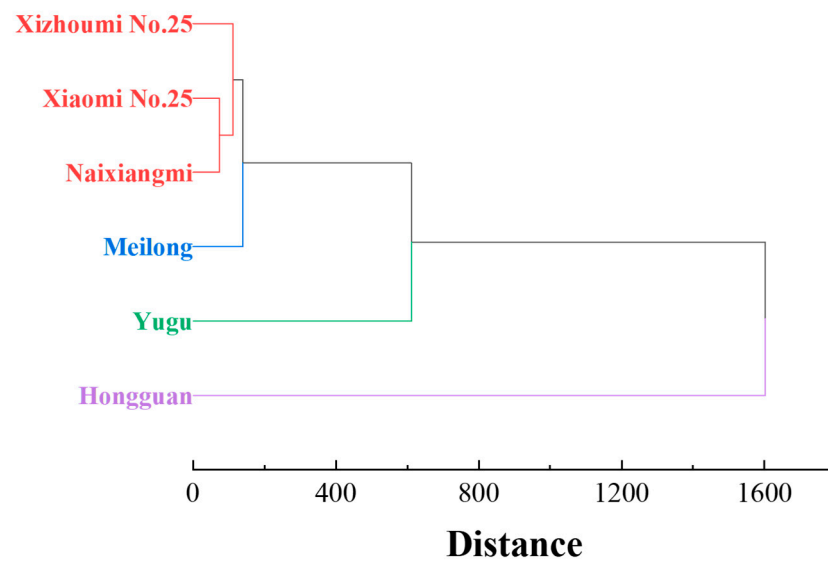

**Figure S2 Hierarchical Cluster Analysis of free, bound, and total TPC, FRAP, ABTS<sup>+</sup>, and phenolic profiles of six melon varieties.**

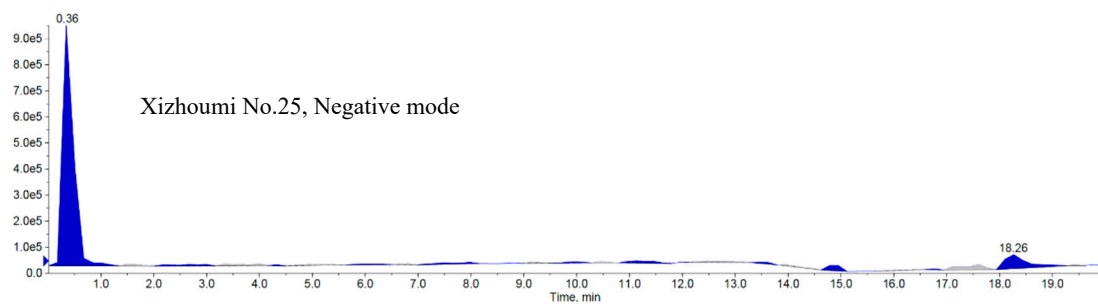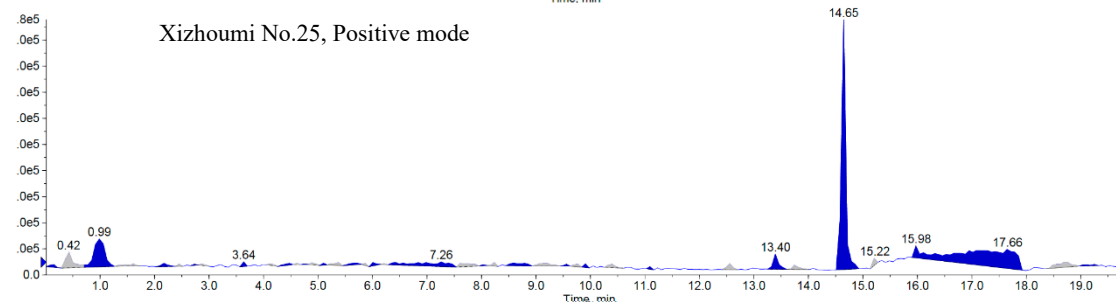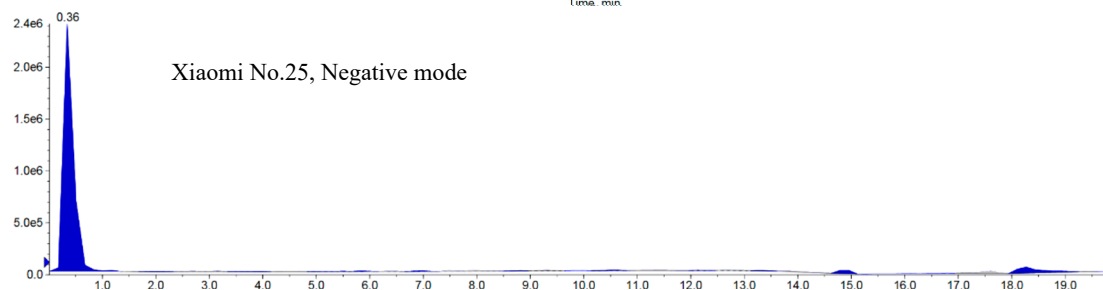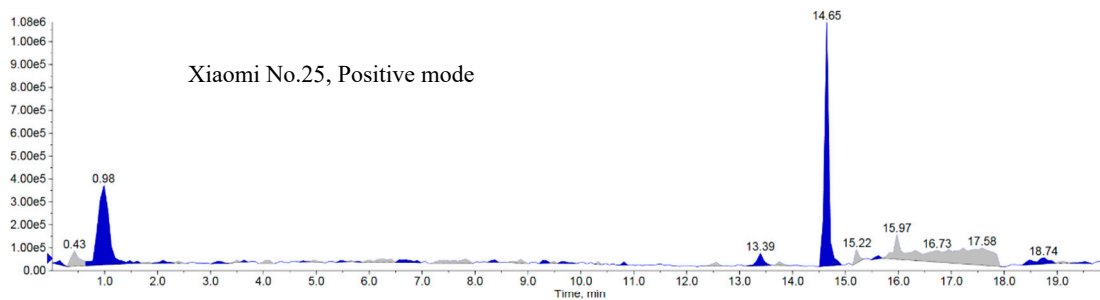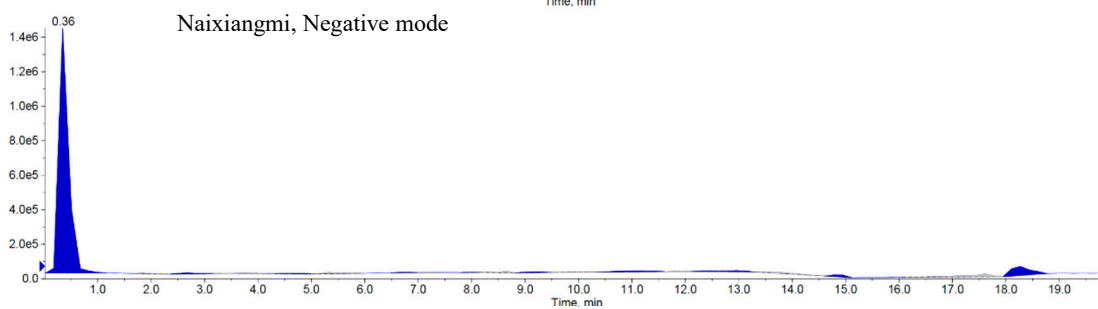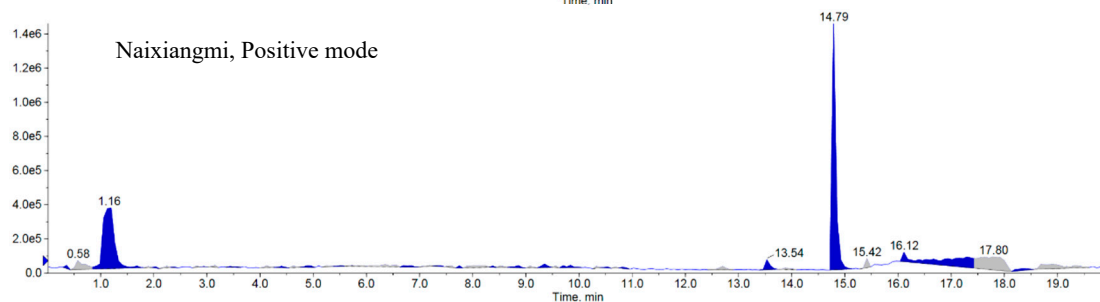

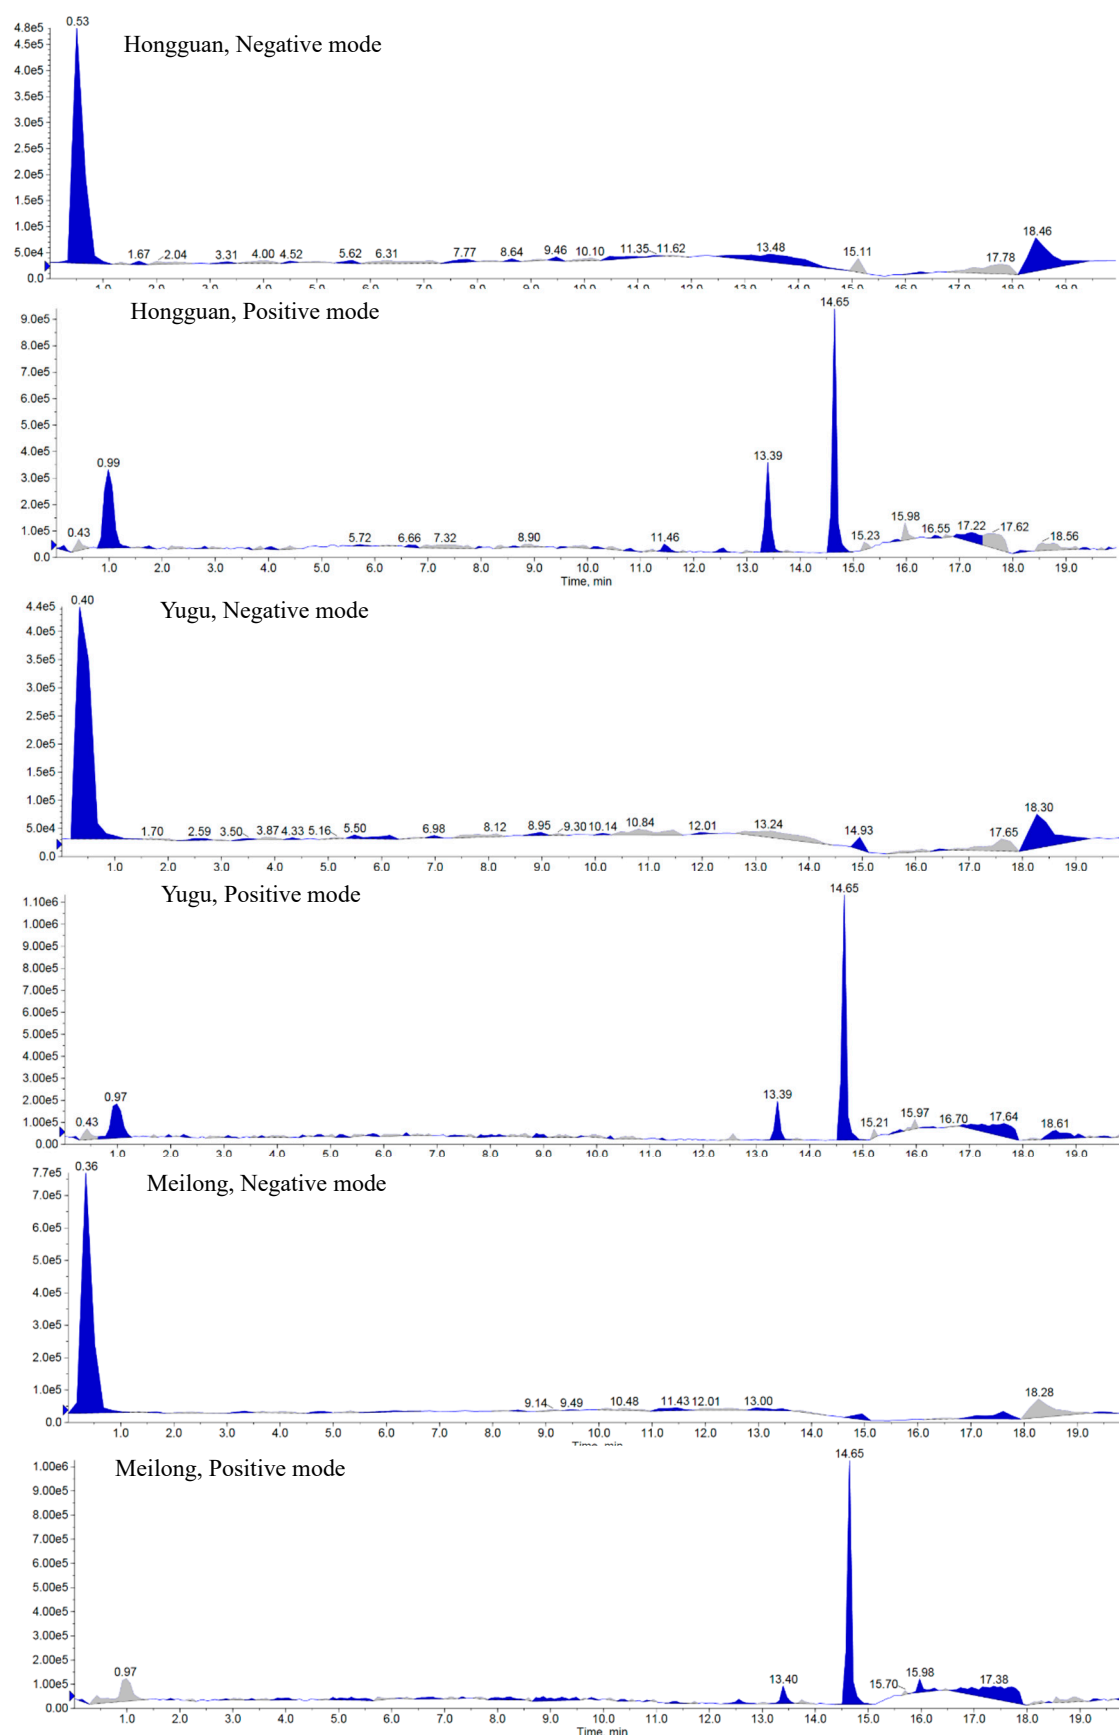

**Figure S3 Total ion chromatogram of free extracts of the pulp of six melon varieties analyzed by UHPLC-QQQ-MS in negative and positive modes**

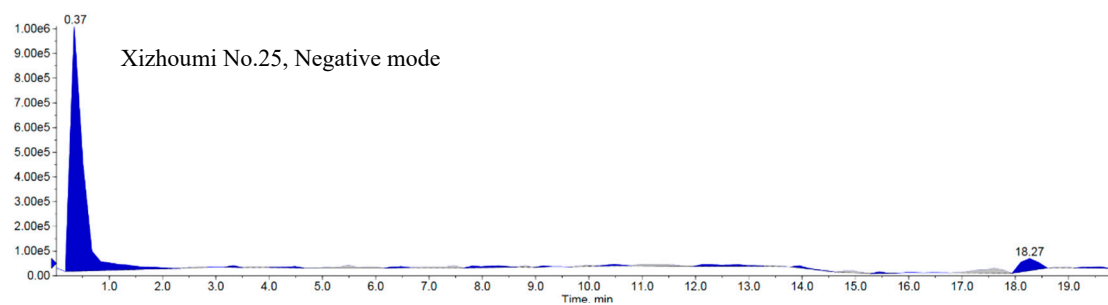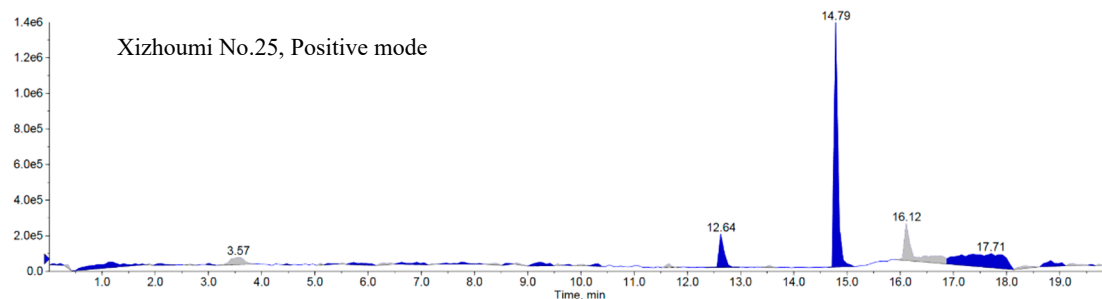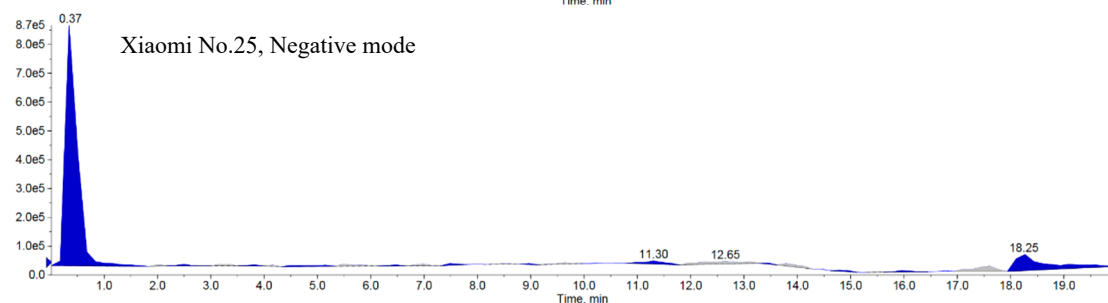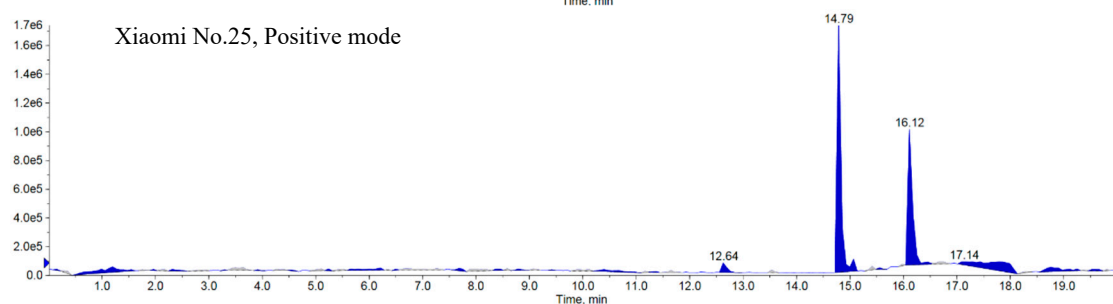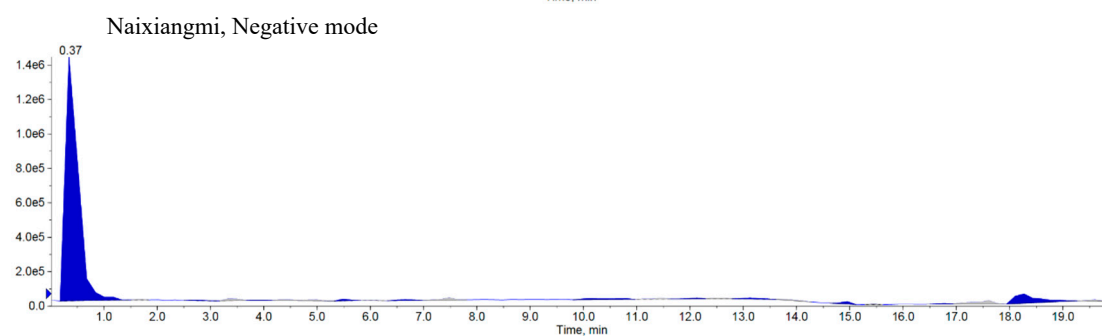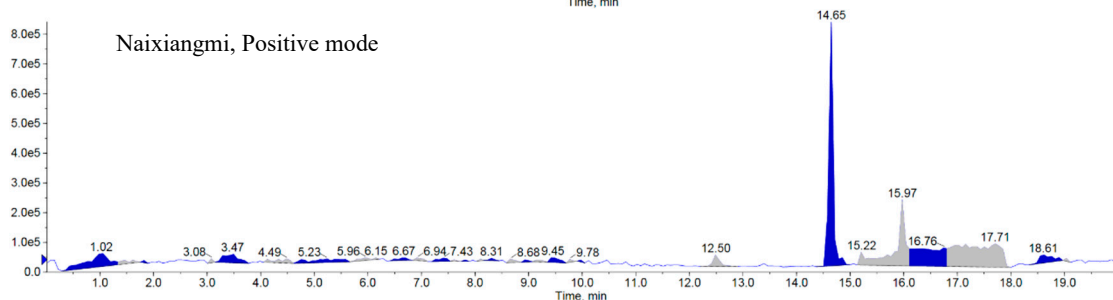

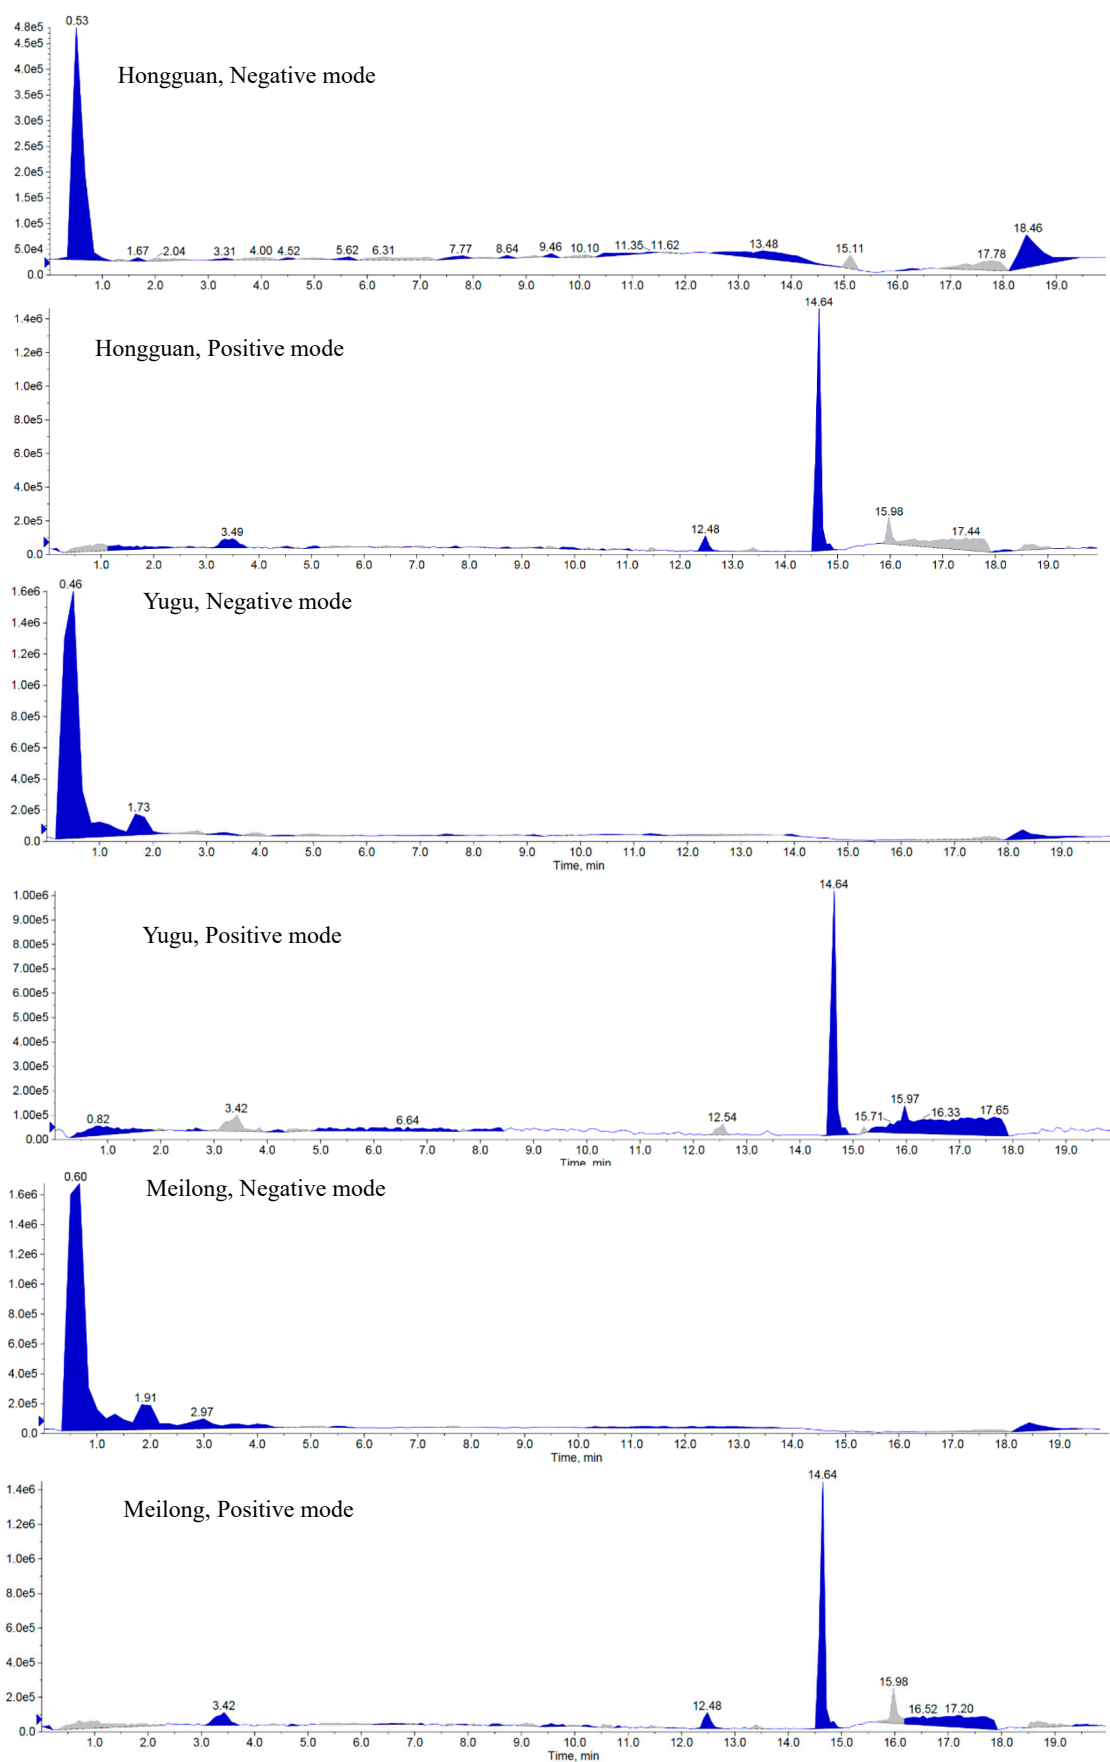

**Figure S4** Total ion chromatogram of bound extracts of the pulp of six melon varieties analyzed by UHPLC-QQQ-MS in negative and positive modes.
